# Supplementary material
Source: MDPI journal article supplement (https://www.mdpi.com/2077-0472/12/6/834)
Supplement: s1 [file s1]

# Effectiveness of Species- and Trichothecene-Specific Primers in Monitoring *Fusarium graminearum* Species Complex in Small Grain–Pea Intercropping Systems

Vesna Župunski <sup>1\*</sup>, Radivoje Jevtić <sup>1</sup>, Milosav Grčak <sup>2</sup>, Mirjana Lalošević <sup>1</sup>, Branka Orbović <sup>1</sup>, Dalibor Živanov <sup>1</sup> and Desimir Knežević <sup>2</sup>

<sup>1</sup> Department of Small Grains, Institute of Field and Vegetable Crops, 21000 Novi Sad, Serbia; vesna.zupunski@ifvcns.ns.ac.rs (V.Ž.); radivoje.jevtic@ifvcns.ns.ac.rs (R.J.); mirjana.lalosevic@ifvcns.ns.ac.rs (M.L.); dalibor.zivanov@ifvcns.ns.ac.rs ([@D.Ž.](mailto:D.Z)) branka.orbovic@ifvcns.ns.ac.rs (B.O.)

<sup>2</sup> Department of Plant Protection, Faculty of Agriculture, University of Priština–Kosovska Mitrovica, 38219 Lešak, Serbia; milosav.grcak@pr.ac.rs (M.G.); deskoo@ptt.rs (D.K.)

\* Correspondence: vesna.zupunski@ifvcns.ns.ac.rs Tel.: +381214898214

**Table S1.** FGSC isolates used in the study with PCR products produced by FGSC specific primer and primer sets for molecular chemotyping

| Culture number | ID in the collection | Cultivation   | Crop        | Seeding time | Fg16F/R<br>SCAR type1 | FgrF/FgcR | Tri315F/R<br>(15-AcDON) | Tri-5F/R<br>( <i>Tri5</i> ) | Morphological characteristics of FGSC |
|----------------|----------------------|---------------|-------------|--------------|-----------------------|-----------|-------------------------|-----------------------------|---------------------------------------|
| 1              | 60S                  | Standalone    | Wheat       | Winter       | -                     | +         | +                       | +                           | +                                     |
| 2              | 61S                  | Standalone    | Wheat       | Winter       | +                     |           | +                       |                             | +                                     |
| 3              | 62S                  | Standalone    | Wheat       | Winter       | +                     |           | +                       |                             | +                                     |
| 4              | 63S                  | Standalone    | Wheat       | Winter       | -                     | +         | +                       | +                           | +                                     |
| 5              | 64S                  | Standalone    | Wheat       | Winter       | -                     | -         | +                       | +                           | +                                     |
| 6              | 66S                  | Standalone    | Wheat       | Winter       | +                     |           | +                       |                             | +                                     |
| 7              | 58S                  | Standalone    | Wheat       | Winter       | +                     |           | +                       |                             | +                                     |
| 8              | 59S                  | Standalone    | Wheat       | Winter       | +                     |           | +                       |                             | +                                     |
| 9              | 65S                  | Standalone    | Wheat       | Winter       | +                     |           | +                       |                             | +                                     |
| 10             | 67S                  | Standalone    | Wheat       | Winter       | +                     |           | +                       |                             | +                                     |
| 11             | 10I                  | Intercropping | Wheat + pea | Winter       | +                     |           | +                       |                             | +                                     |
| 12             | 11I                  | Intercropping | Wheat + pea | Winter       | +                     |           | +                       |                             | +                                     |
| 13             | 13I                  | Intercropping | Wheat + pea | Winter       | +                     |           | +                       |                             | +                                     |

|    |      |               |                 |        |   |   |   |   |   |
|----|------|---------------|-----------------|--------|---|---|---|---|---|
| 14 | 15S  | Standalone    | Rye             | Winter | + |   | + |   | + |
| 15 | 16S  | Standalone    | Rye             | Winter | + |   | + |   | + |
| 16 | 17S  | Standalone    | Rye             | Winter | - | + | + | + | + |
| 17 | 20S  | Standalone    | Rye             | Winter | - | + | + | + | + |
| 18 | 21S  | Standalone    | Rye             | Winter | + |   | + |   | + |
| 19 | 19S  | Standalone    | Rye             | Winter | + |   | + |   | + |
| 20 | 68I  | Intercropping | Rye + pea       | Winter | + |   | + |   | + |
| 21 | 77I  | Intercropping | Rye + pea       | Winter | - | + | + | + | + |
| 22 | 76I  | Intercropping | Rye + pea       | Winter | + |   | + |   | + |
| 23 | 36S  | Standalone    | Triticale       | Winter | + |   | + |   | + |
| 24 | 38S  | Standalone    | Triticale       | Winter | - | - | + | + | + |
| 25 | 26S  | Standalone    | Triticale       | Winter | - | + | - | + | + |
| 26 | 28S  | Standalone    | Triticale       | Winter | + |   | + |   | + |
| 27 | 90I  | Intercropping | Triticale + pea | Winter | - | + | - | + | + |
| 28 | 91I  | Intercropping | Triticale + pea | Winter | - | - | + | + | + |
| 29 | 92I  | Intercropping | Triticale + pea | Winter | + | - | + |   | + |
| 30 | 93I  | Intercropping | Triticale + pea | Winter | - | + | + | + | + |
| 31 | 94I  | Intercropping | Triticale + pea | Winter | - | + | + | + | + |
| 32 | 96I  | Intercropping | Triticale + pea | Winter | + |   | + |   | + |
| 33 | 97I  | Intercropping | Triticale + pea | Winter | + |   | + |   | + |
| 34 | 123S | Standalone    | Wheat           | Spring | - | + | + | + | + |
| 35 | 125S | Standalone    | Wheat           | Spring | - | - | - | + | + |
| 36 | 126S | Standalone    | Wheat           | Spring | + |   | + |   | + |
| 37 | 127S | Standalone    | Wheat           | Spring | + |   | + |   | + |
| 38 | 128S | Standalone    | Wheat           | Spring | + |   | + |   | + |
| 39 | 186I | Intercropping | Wheat + pea     | Spring | + |   | + |   | + |
| 40 | 190I | Intercropping | Wheat + pea     | Spring | + |   | + |   | + |
| 41 | 192I | Intercropping | Wheat + pea     | Spring | + |   | + |   | + |
| 42 | 191I | Intercropping | Wheat + pea     | Spring | + |   | + |   | + |
| 43 | 138S | Standalone    | Rye             | Spring | + |   | + |   | + |
| 44 | 200I | Intercropping | Rye + pea       | Spring | + |   | + |   | + |

|    |      |               |                 |        |   |   |   |   |   |
|----|------|---------------|-----------------|--------|---|---|---|---|---|
| 45 | 155S | Standalone    | Triticale       | Spring | - | + | + | + | + |
| 46 | 157S | Standalone    | Triticale       | Spring | - | - | - | + | + |
| 47 | 211I | Intercropping | Triticale + pae | Spring | - | + | + | + | + |
| 48 | 212I | Intercropping | Triticale + pae | Spring | - | + | + | + | + |
| 49 | 219I | Intercropping | Triticale + pae | Spring | + | - | + |   | + |
| 50 | 222I | Intercropping | Triticale + pae | Spring | - | + | - | + | + |
| 51 | 223I | Intercropping | Triticale + pae | Spring | - | + | + | + | + |
| 52 | 224I | Intercropping | Triticale + pae | Spring | + |   | + |   | + |
| 53 | 168I | Standalone    | Oat             | Spring | - | + | + | + | + |

---

+/- indicates presence/absence of PCR product; Fg16F/R primer pair for *F. graminearum* s. *stricto*; FgrF/FgcR primer pair for *F. graminearum* s. *lato*
