# Supplementary material
Source: MDPI journal article supplement (https://www.mdpi.com/2077-0472/12/6/834)
Supplement: s1 [file s1]

# Effectiveness of Species- and Trichothecene-Specific Primers in Monitoring *Fusarium graminearum* Species Complex in Small Grain–Pea Intercropping Systems

Vesna Župunski <sup>1\*</sup>, Radivoje Jevtić <sup>1</sup>, Milosav Grčak <sup>2</sup>, Mirjana Lalošević <sup>1</sup>, Branka Orbović <sup>1</sup>, Dalibor Živanov <sup>1</sup> and Desimir Knežević <sup>2</sup>

<sup>1</sup> Department of Small Grains, Institute of Field and Vegetable Crops, 21000 Novi Sad, Serbia; vesna.zupunski@ifvcns.ns.ac.rs (V.Ž.); radivoje.jevtic@ifvcns.ns.ac.rs (R.J.); mirjana.lalosevic@ifvcns.ns.ac.rs (M.L.); dalibor.zivanov@ifvcns.ns.ac.rs (D.Ž.); branka.orbovic@ifvcns.ns.ac.rs (B.O.)

<sup>2</sup> Department of Plant Protection, Faculty of Agriculture, University of Priština–Kosovska Mitrovica, 38219 Lešak, Serbia; milosav.grcak@pr.ac.rs (M.G.); deskoa@ptt.rs (D.K.)

\* Correspondence: vesna.zupunski@ifvcns.ns.ac.rs Tel.: +381214898214

Table S3. Averages of grain infection with FGSC and *Alternaria* spp. in standalone and intercrop cultivation of wheat, rye, triticale and oat with pea in Serbia

| Small grains | Time of sowing | Type of cultivation    | FDK (%) FGSC | ACK (%) | Relative frequency <i>F. graminearum</i> s. <i>stricto</i> (%) | Relative frequency <i>F. graminearum</i> s. <i>lato</i> (%) | Relative frequency Nonidentified FGSC (%) |
|--------------|----------------|------------------------|--------------|---------|----------------------------------------------------------------|-------------------------------------------------------------|-------------------------------------------|
| Wheat        | Winter         | Intercropping with pea | 7.5          | 37.5    | 5.6604                                                         | 0                                                           | 0                                         |
| Wheat        | Winter         | Standalone             | 25           | 40      | 13.2075                                                        | 3.77358                                                     | 1.88679                                   |
| Wheat        | Spring         | Intercropping with pea | 10           | 30      | 7.5472                                                         | 0                                                           | 0                                         |
| Wheat        | Spring         | Standalone             | 12.5         | 20      | 5.6604                                                         | 1.88679                                                     | 1.88679                                   |
| Rye          | Winter         | Intercropping with pea | 7.5          | 70      | 3.7736                                                         | 1.88679                                                     | 0                                         |
| Rye          | Winter         | Standalone             | 15           | 5       | 7.5472                                                         | 3.77358                                                     | 0                                         |
| Rye          | Spring         | Intercropping with pea | 2.5          | 35      | 1.8868                                                         | 0                                                           | 0                                         |
| Rye          | Spring         | Standalone             | 2.5          | 25      | 1.8868                                                         | 0                                                           | 0                                         |
| Triticale    | Winter         | Intercropping with pea | 17.5         | 12.5    | 5.6604                                                         | 5.66038                                                     | 1.88679                                   |
| Triticale    | Winter         | Standalone             | 10           | 17.5    | 3.7736                                                         | 1.88679                                                     | 1.88679                                   |
| Triticale    | Spring         | Intercropping with pea | 15           | 30      | 3.7736                                                         | 7.54717                                                     | 0                                         |
| Triticale    | Spring         | Standalone             | 5            | 30      | 0                                                              | 1.88679                                                     | 1.88679                                   |
| Oats         | Winter         | Intercropping with pea | 0            | 42.5    | 0                                                              | 0                                                           | 0                                         |
| Oats         | Winter         | Standalone             | 0            | 50      | 0                                                              | 0                                                           | 0                                         |
| Oats         | Spring         | Intercropping with pea | 0            | 45      | 0                                                              | 0                                                           | 0                                         |
| Oats         | Spring         | Standalone             | 2.5          | 35      | 0                                                              | 1.88679                                                     | 0                                         |
