# Supplementary material
Source: MDPI journal article supplement (https://www.mdpi.com/2077-0472/12/6/834)
Supplement: s1 [file s1]

# Effectiveness of Species- and Trichothecene-Specific Primers in Monitoring *Fusarium graminearum* Species Complex in Small Grain–Pea Intercropping Systems

Vesna Župunski <sup>1\*</sup>, Radivoje Jevtić <sup>1</sup>, Milosav Grčak <sup>2</sup>, Mirjana Lalošević <sup>1</sup>, Branka Orbović <sup>1</sup>, Dalibor Živanov <sup>1</sup> and Desimir Knežević <sup>2</sup>

<sup>1</sup> Department of Small Grains, Institute of Field and Vegetable Crops, 21000 Novi Sad, Serbia; vesna.zupunski@ifvcns.ns.ac.rs (V.Ž.); radivoje.jevtic@ifvcns.ns.ac.rs (R.J.); mirjana.lalosevic@ifvcns.ns.ac.rs (M.L.); dalibor.zivanov@ifvcns.ns.ac.rs (D.Ž.); branka.orbovic@ifvcns.ns.ac.rs (B.O.)

<sup>2</sup> Department of Plant Protection, Faculty of Agriculture, University of Priština–Kosovska Mitrovica, 38219 Lešak, Serbia; milosav.grcak@pr.ac.rs (M.G.); deskoa@ptt.rs (D.K.)

\* Correspondence: vesna.zupunski@ifvcns.ns.ac.rs Tel.: +381214898214

Table S4: Amount of variance retained by each principal component in the MCA analysis

|                 | F1     | F2     | F3     | F4     | F5     | F6     | F7     | F8      |
|-----------------|--------|--------|--------|--------|--------|--------|--------|---------|
| Eigenvalue      | 0.369  | 0.278  | 0.242  | 0.232  | 0.163  | 0.146  | 0.097  | 0.072   |
| Variability (%) | 23.086 | 17.401 | 15.121 | 14.528 | 10.173 | 9.156  | 6.059  | 4.476   |
| Cumulative %    | 23.086 | 40.487 | 55.608 | 70.136 | 80.309 | 89.465 | 95.524 | 100.000 |
