# Supplementary material
Source: MDPI journal article supplement (https://www.mdpi.com/2077-0472/12/6/834)
Supplement: s1 [file s1]

# Effectiveness of Species- and Trichothecene-Specific Primers in Monitoring *Fusarium graminearum* Species Complex in Small Grain–Pea Intercropping Systems

Vesna Župunski <sup>1\*</sup>, Radivoje Jevtić <sup>1</sup>, Milosav Grčak <sup>2</sup>, Mirjana Lalošević <sup>1</sup>, Branka Orbović <sup>1</sup>, Dalibor Živanov <sup>1</sup> and Desimir Knežević <sup>2</sup>

<sup>1</sup> Department of Small Grains, Institute of Field and Vegetable Crops, 21000 Novi Sad, Serbia; vesna.zupunski@ifvcns.ns.ac.rs (V.Ž.); radivoje.jevtic@ifvcns.ns.ac.rs (R.J.); mirjana.lalosevic@ifvcns.ns.ac.rs (M.L.); dalibor.zivanov@ifvcns.ns.ac.rs (D.Ž.); branka.orbovic@ifvcns.ns.ac.rs (B.O.)

<sup>2</sup> Department of Plant Protection, Faculty of Agriculture, University of Priština–Kosovska Mitrovica, 38219 Lešak, Serbia; milosav.grcak@pr.ac.rs (M.G.); deskooa@ptt.rs (D.K.)

\* Correspondence: vesna.zupunski@ifvcns.ns.ac.rs Tel.: +381214898214

**Table S2.** Relative frequencies of *F. graminearum* s. stricto, *F. graminearum* s. lato and unidentified (FGSC) per crop.

| Crop         | sensu stricto | sensu lato | unidentified | Total number of isolates per crop | Relative frequency (sensu stricto) | Relative frequency (sensu lato) | Relative frequency (unidentified) |
|--------------|---------------|------------|--------------|-----------------------------------|------------------------------------|---------------------------------|-----------------------------------|
| Wheat        | 3             | 0          | 0            | 22                                | 77.27                              | 13.63                           | 9.09                              |
| Wheat        | 7             | 2          | 1            |                                   |                                    |                                 |                                   |
| Wheat        | 4             | 0          | 0            |                                   |                                    |                                 |                                   |
| Wheat        | 3             | 1          | 1            |                                   |                                    |                                 |                                   |
| Rye          | 2             | 1          | 0            | 11                                | 72.72                              | 27.27                           | 0                                 |
| Rye          | 4             | 2          | 0            |                                   |                                    |                                 |                                   |
| Rye          | 1             | 0          | 0            |                                   |                                    |                                 |                                   |
| Rye          | 1             | 0          | 0            |                                   |                                    |                                 |                                   |
| Triticale    | 3             | 3          | 1            | 19                                | 36.84                              | 47.36                           | 15.78                             |
| Triticale    | 2             | 1          | 1            |                                   |                                    |                                 |                                   |
| Triticale    | 2             | 4          | 0            |                                   |                                    |                                 |                                   |
| Triticale    | 0             | 1          | 1            |                                   |                                    |                                 |                                   |
| Oat          | 0             | 0          | 0            | 1                                 | 0                                  | 100                             | 0                                 |
| Oat          | 0             | 0          | 0            |                                   |                                    |                                 |                                   |
| Oat          | 0             | 0          | 0            |                                   |                                    |                                 |                                   |
| Oat          | 0             | 1          | 0            |                                   |                                    |                                 |                                   |
| <b>Total</b> | <b>32</b>     | <b>16</b>  | <b>5</b>     | <b>53</b>                         |                                    |                                 |                                   |

The counts of *F. graminearum* s. stricto, *F. graminearum* s. lato and unidentified *Fusarium* species per each crop were divided by the total number of isolates per crop to obtain relative frequency.
